# Supplementary material for: An Outbreak of Dengue Virus Serotype 2 Cosmopolitan Genotype in Nepal, 2017
Source: MDPI journal article supplement (doi:10.3390/v13081444), 2021-07-24

Supplementary Figure S1. Mean Virus titer in serum, (a) of real time PCR positive in 49 patients, (b) of 27 patients with DENV isolates.

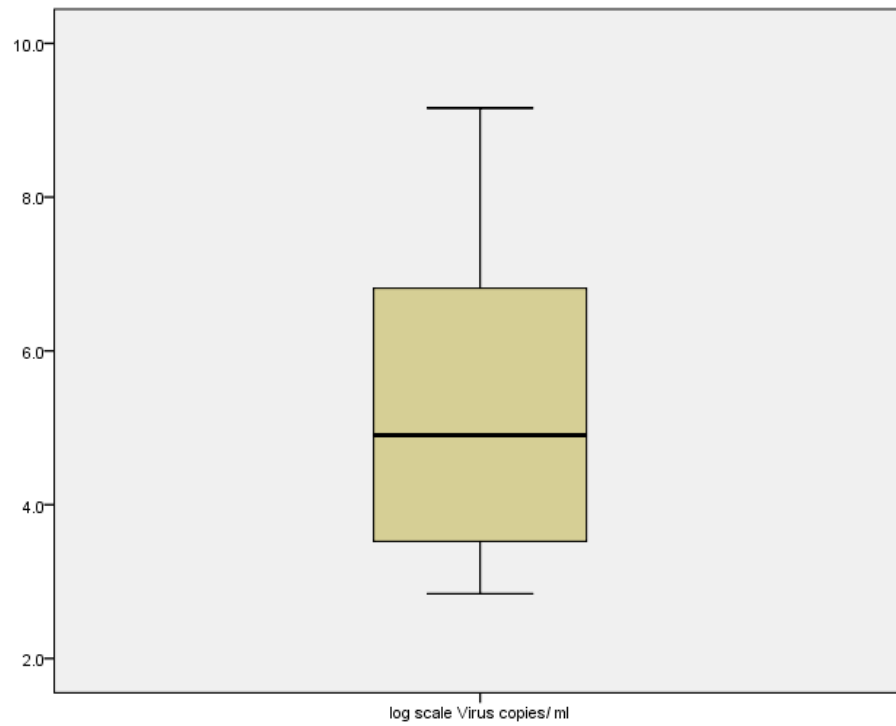

(a)

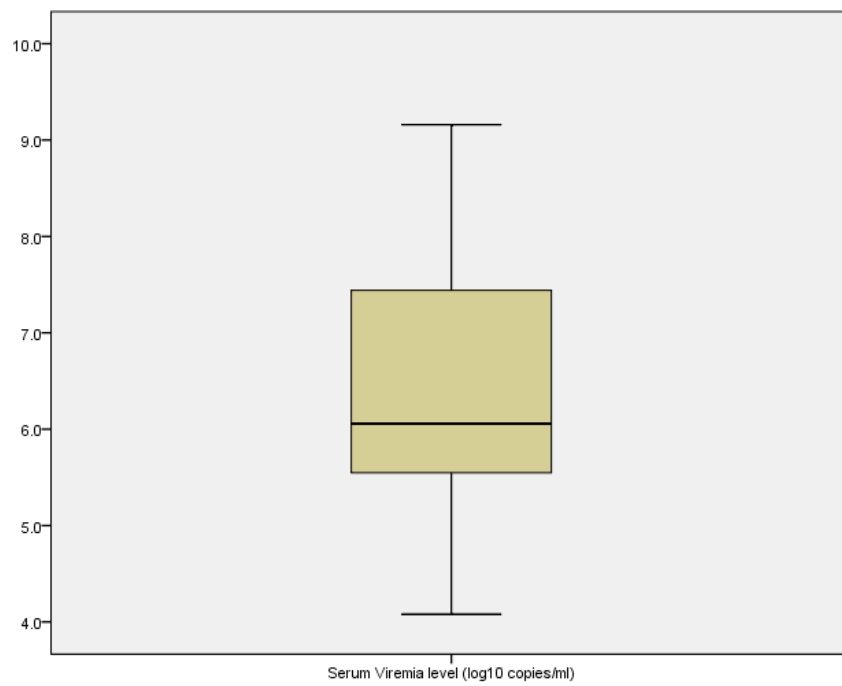

(b)

Supplementary Figure S2. The ration of frequencies of synonymous and nonsynonymous mutation (n S/S) among structural and non-structural genes.

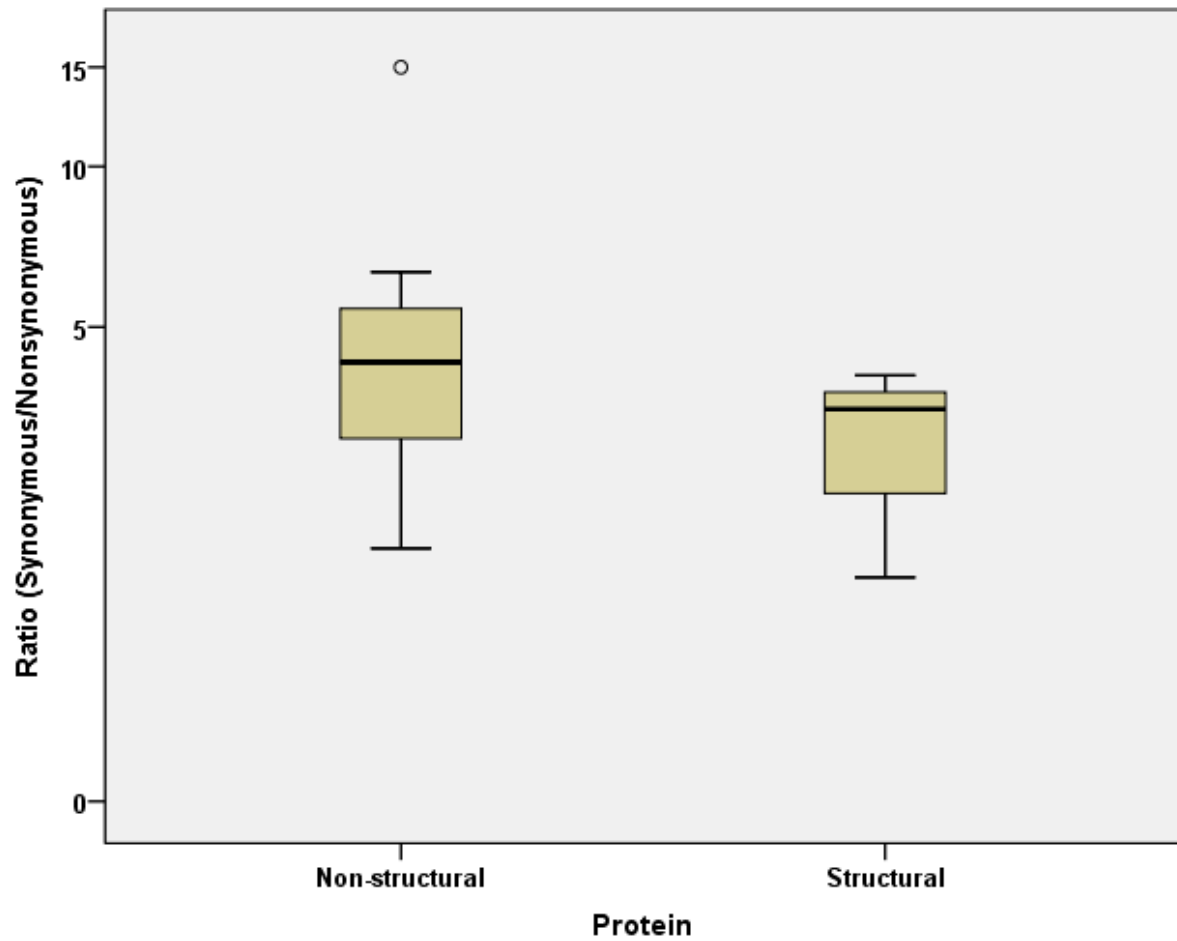

Supplement: s1 [file s1]
